# Supplementary material for: 3D culture of bovine articular chondrocytes in viscous medium encapsulated in agarose hydrogels for investigation of viscosity influence on cell functions
Source: Royal Society of Chemistry journal article supplement (doi:10.1039/d3tb01174g), 2023-01-01

## Supplementary Information

3D culture of bovine articular chondrocytes in viscous medium encapsulated in agarose hydrogels for investigation of viscosity influence on cell functions

Jing Zheng <sup>ab</sup>, Huajian Chen <sup>a</sup>, Chengyu Lu <sup>ab</sup>, Toru Yoshitomi <sup>a</sup>, Naoki Kawazoe <sup>a</sup>, Yingnan Yang <sup>c</sup> and Guoping Chen <sup>\*ab</sup>

- a. Research Center for Macromolecules and biomaterials, National Institute for Materials Science, 1-1 Namiki, Tsukuba, Ibaraki 305-0044, Japan E-mail: Guoping.CHEN@nims.go.jp; Tel: 81-29-860-4496; Fax: 81-29-860-4673
- b. Department of Materials Science and Engineering, Graduate School of Pure and Applied Sciences, University of Tsukuba, 1-1-1 Tennodai, Tsukuba, Ibaraki 305-8577, Japan
- c. Graduate School of Life and Environmental Science, University of Tsukuba, 1-1-1 Tennodai, Tsukuba, Ibaraki 305-8572, Japan

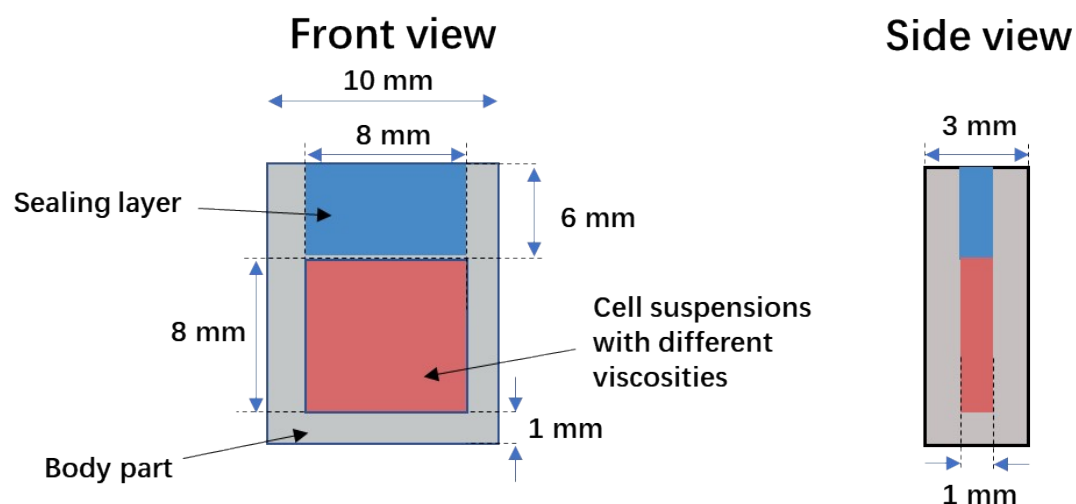

**Figure S1.** Illustration of hydrogel containers.

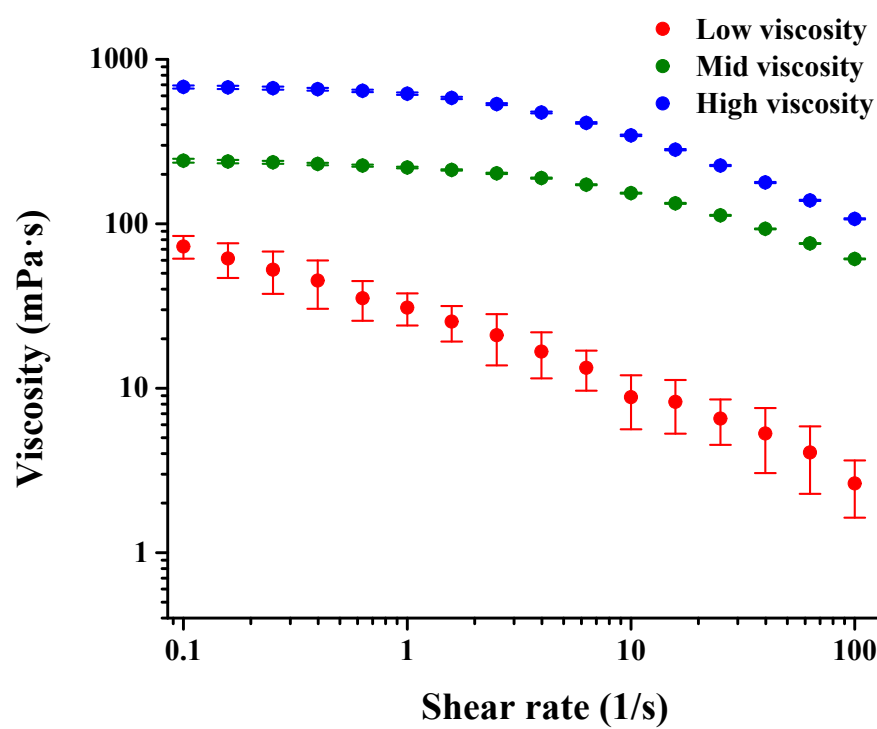

**Figure S2.** Viscosity curves of culture media of different viscosity.

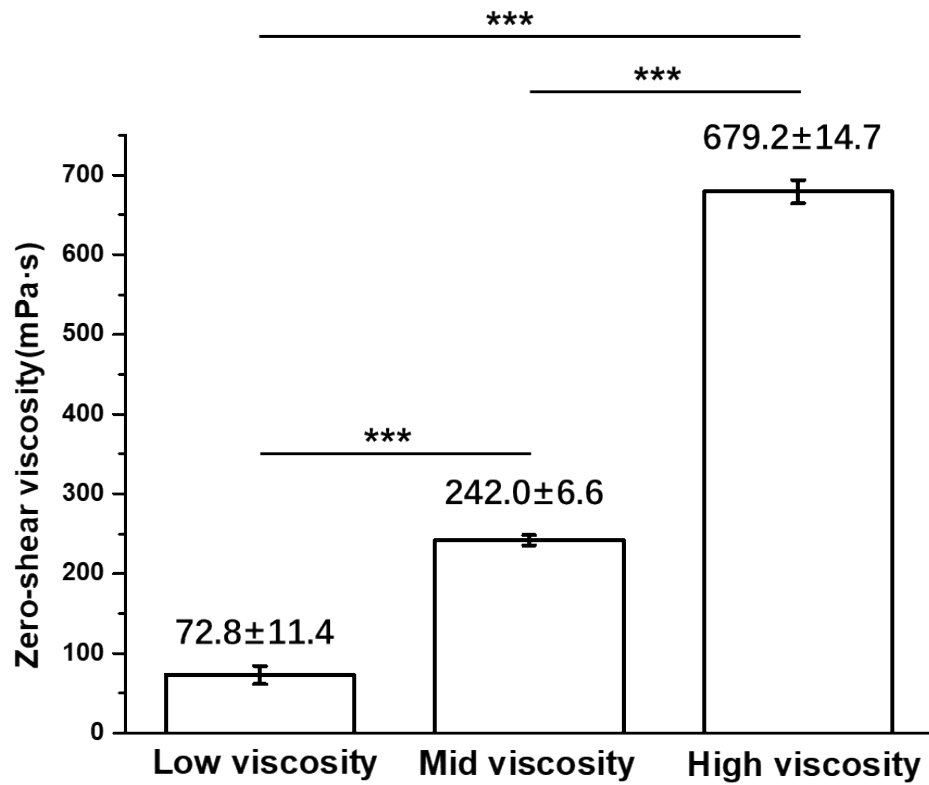

**Figure S3.** Zero-shear viscosity of culture media of different viscosity. Data are shown as the mean  $\pm$ SD, N = 3. \*p < 0.05; \*\*p < 0.01 and \*\*\*p < 0.001.

**Figure S4.** Live/dead staining of BACs during 3D culture in the media of different viscosity after 7 d culture. Scale bar: 100  $\mu$ m.

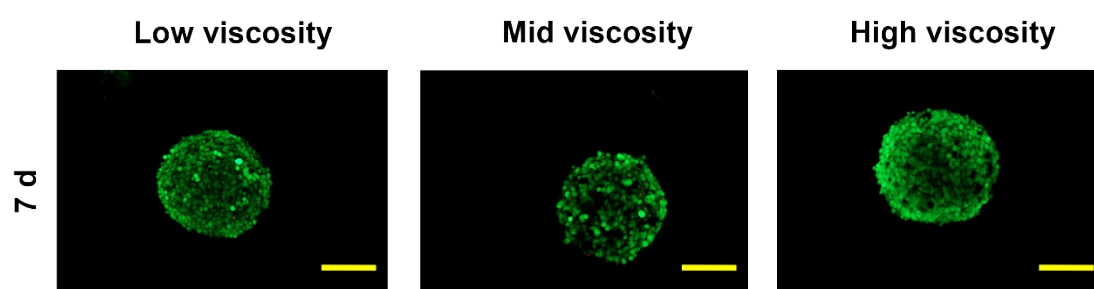

Supplement: d3tb01174g1.pdf [file d3tb01174g1.pdf]
